# Supplementary material for: Complexes of myo-inositol-hexakisphosphate (InsP6) with zinc or lanthanum to enhance excretion of radioactive strontium from the body
Source: PLoS One. 2018 Apr 3;13(4):e0195067. doi: 10.1371/journal.pone.0195067 (PMC5882106; doi:10.1371/journal.pone.0195067)

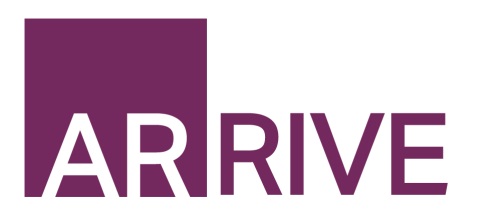


The ARRIVE Guidelines Checklist

Animal Research: Reporting In Vivo Experiments

Carol Kilkenny1, William J Browne2, Innes C Cuthill3, Michael Emerson4 and Douglas G Altman5

*1The National Centre for the Replacement, Refinement and Reduction of Animals in Research, London, UK, 2School of Veterinary Science, University of Bristol, Bristol, UK, 3School of Biological Sciences, University of Bristol, Bristol, UK, 4National Heart and Lung Institute, Imperial College London, UK, 5Centre for Statistics in Medicine, University of Oxford, Oxford, UK.*

|  | | ITEM | RECOMMENDATION | Section/ Paragraph |
| --- | --- | --- | --- | --- |
| 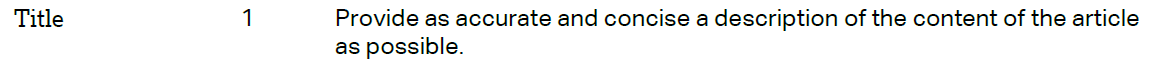 | | | Title |
| 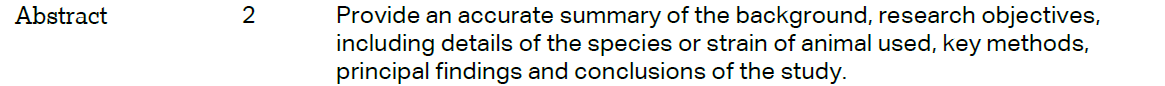 | | | Abstract |
| INTRODUCTION | | |  |
| 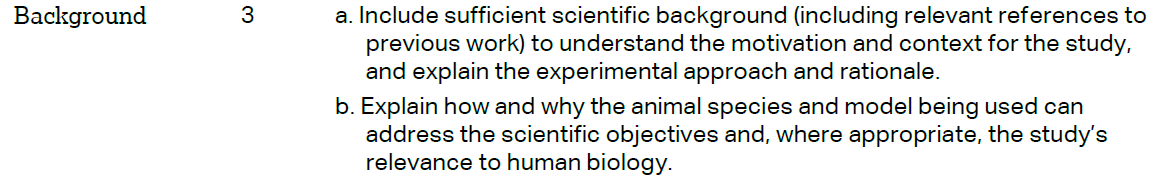 | | | Page 4 Line 2 - Page 5 Line 18  Page 5 Line 18 - Page 6 Line 2 |
| 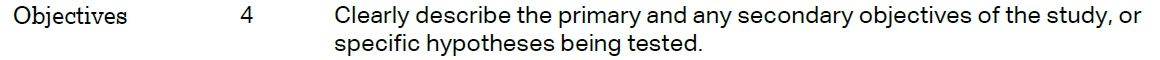 | | | Page 5 Line 8-16 |
| METHODS | | |  |
| 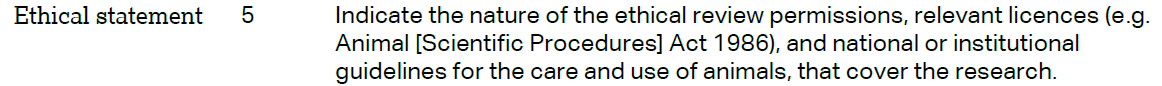 | | | Page 8 Line 9-17 |
| 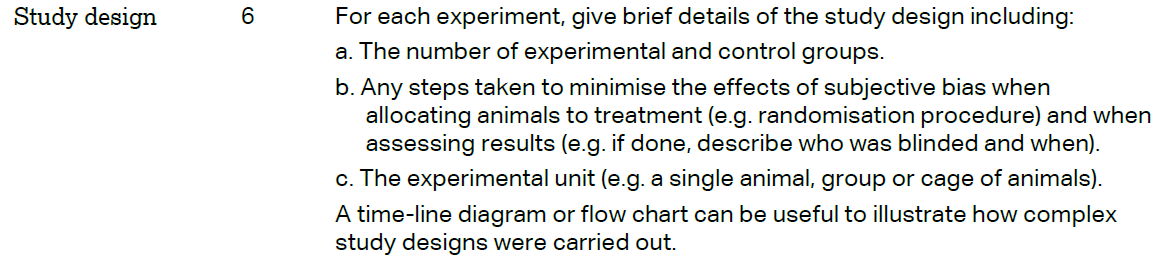 | | | a. Page 8 Line 17 - Page 9 Line 8  b. Page 8 Line 18  c. a single animal |
| 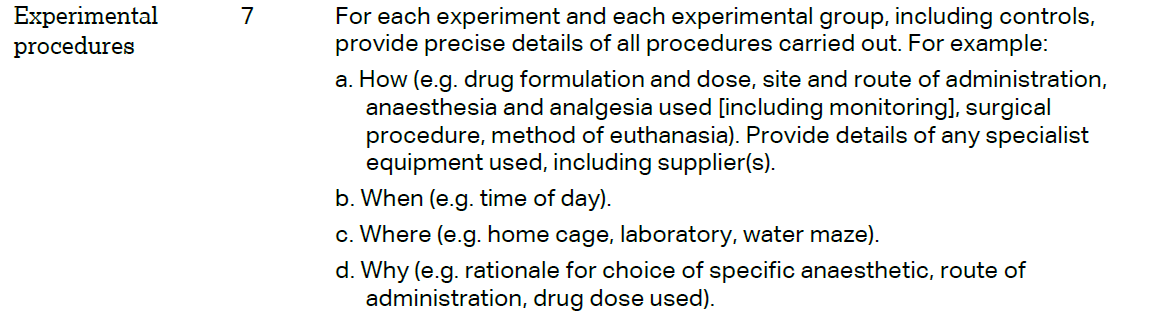 | | | Page 8 Line 18 - Page 9 Line 18 |
| 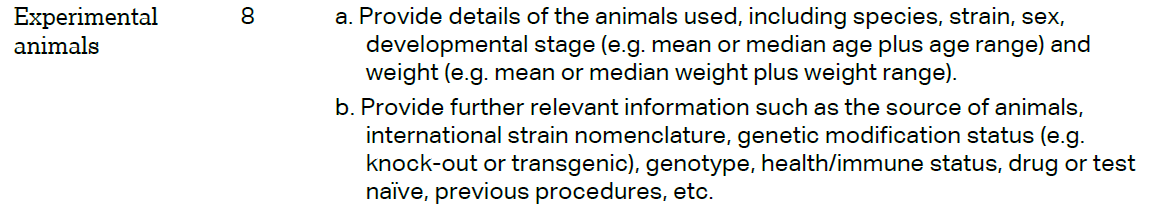 | | | Page 9 Line 2 - 3 |

The ARRIVE guidelines. Originally published in *PLoS Biology*, June 20101

| 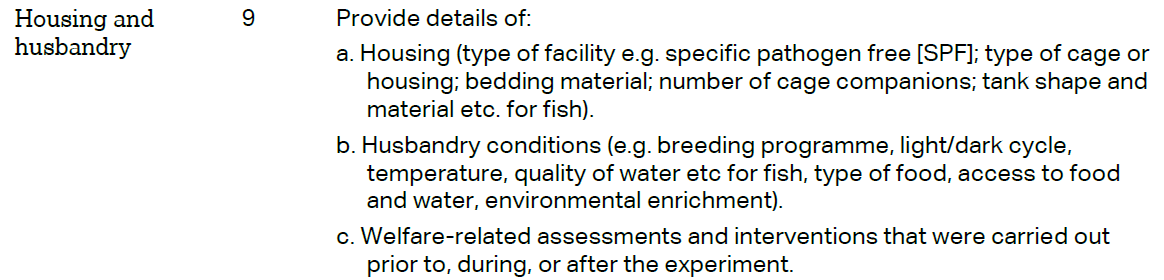 | a. Page 8 Line 13-16  b. Page 8 Line 13-15  c. Not relevant | |
| --- | --- | --- |
| 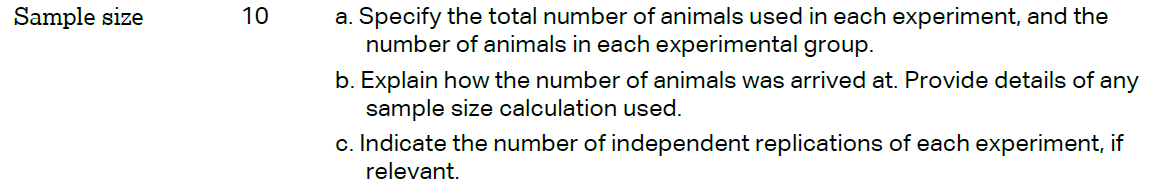 | a. Tables 1-4  b. Page 9 Line 8-10  c. Not relevant | |
| 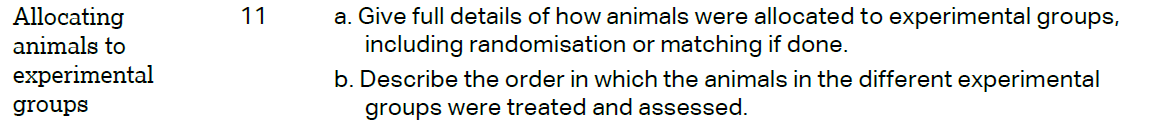 | a. Page 8 Line 18  b. Not relevant | |
| 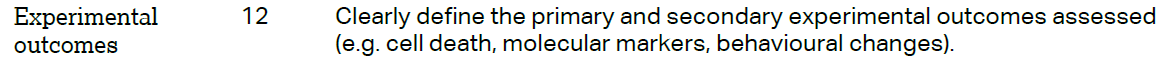 | Page 9 Line 13-14 | |
| 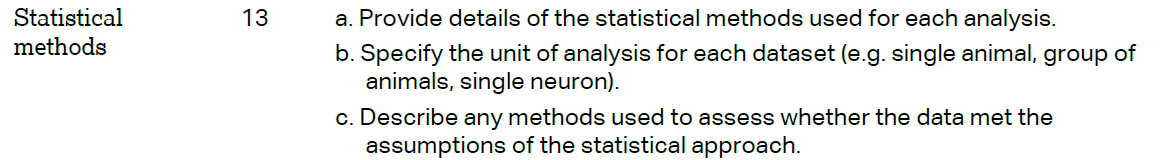 | a. Not relevant  b. Not relevant  c. Not relevant | |
| RESULTS |  | |
| 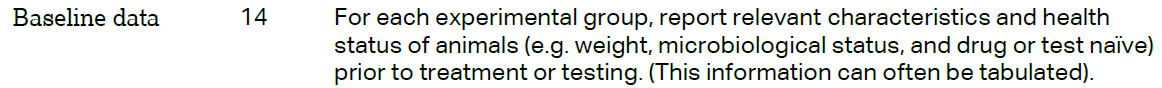 | Page 9 Line 3 | |
| 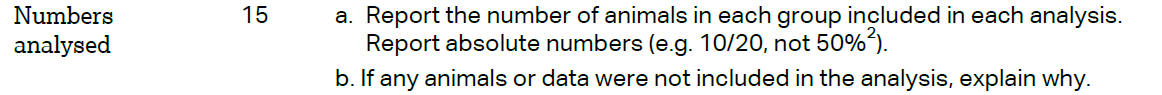 | a. Tables 1-4  b. Not relevant | |
| 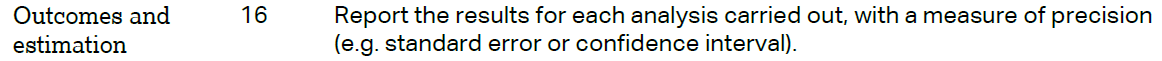 | Tables 1-4 | |
| 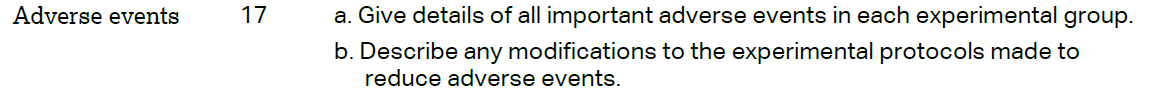 | Not relevant | |
| DISCUSSION |  | |
| 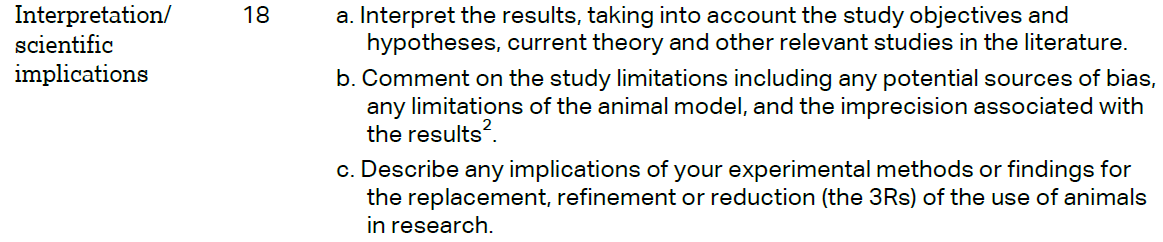 | Page 16 Line 6 - Page 19 Line 15  b. Not relevant  c. Not relevant | |
| 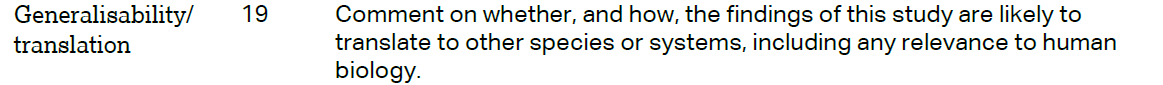 | Page 17 Line 3 - 6 | |
| 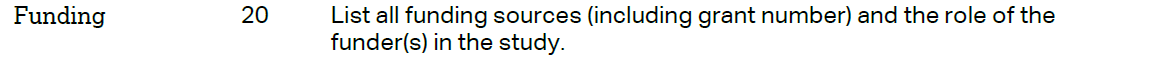 | | Not relevant |


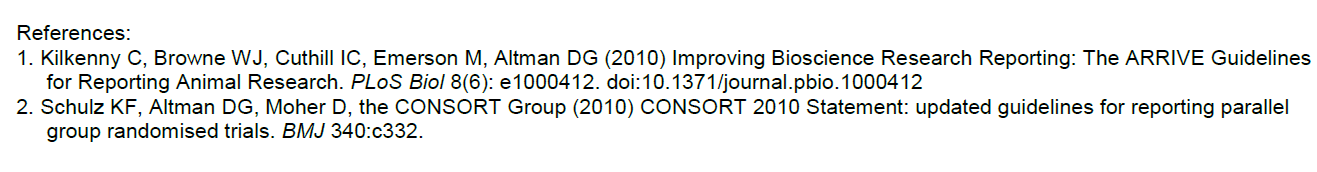

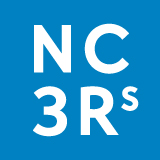

Supplement: S1 File — (DOCX) [file pone.0195067.s001.docx]
